# Supplementary material
Source: ML conference proceedings conference paper supplement (https://openreview.net/forum?id=m8bypnj7Yl5)

Euler

Position Residuals

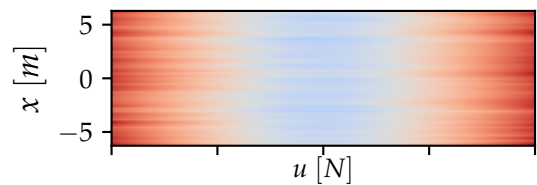

Velocity Residuals

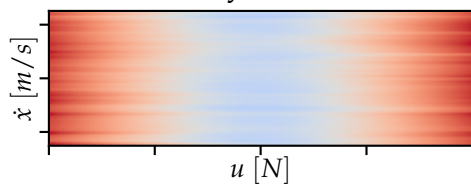

Angular Position Residuals

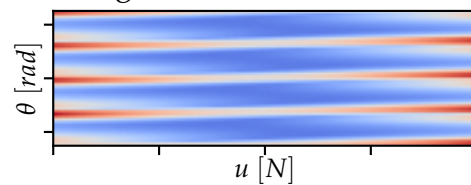

Angular Velocity Residuals

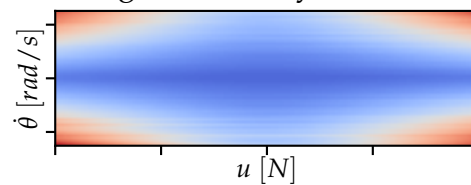

First-Stage

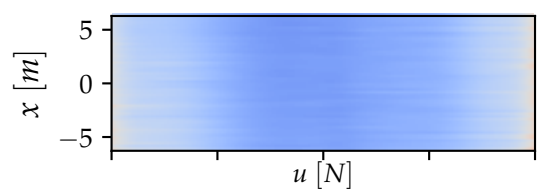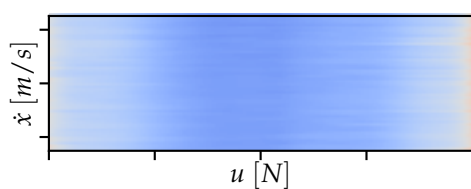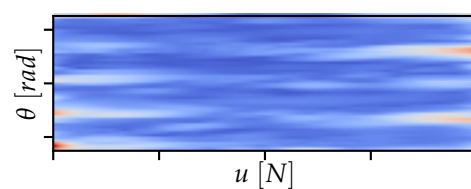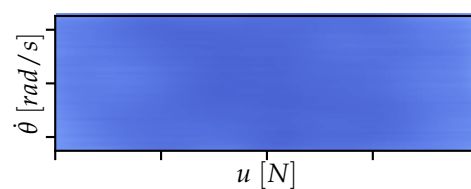

Multi-Stage

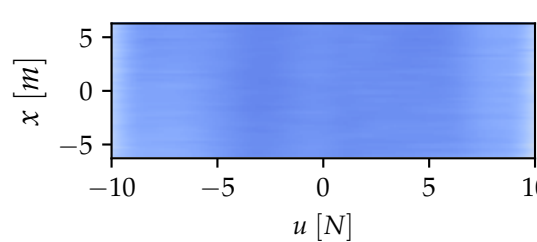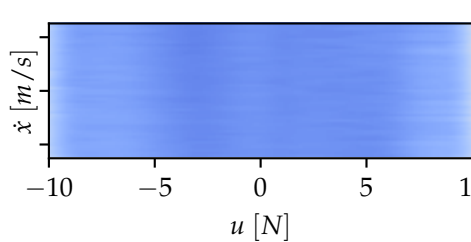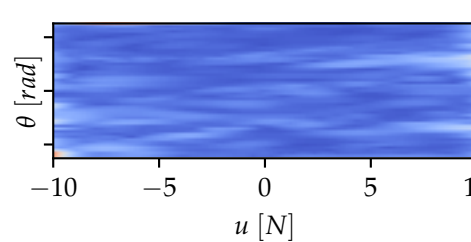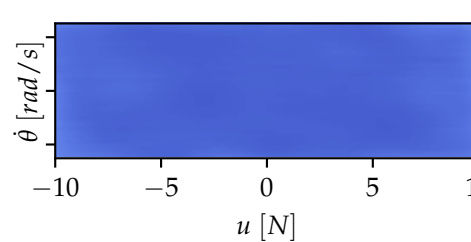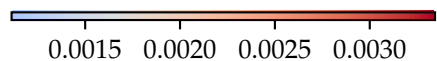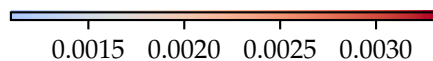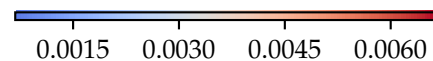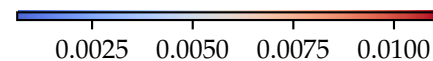

Supplement: supplementary_material [file attachment]
