# Supplementary material
Source: ML conference proceedings conference paper supplement (https://openreview.net/forum?id=m8bypnj7Yl5)

# Pendulum Controlled Trajectories

Phase Space

HyperEuler

Euler

Midpoint

RK4

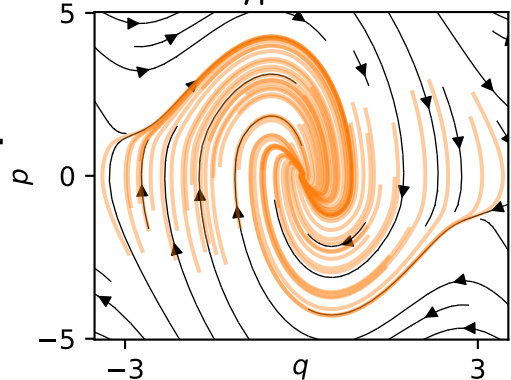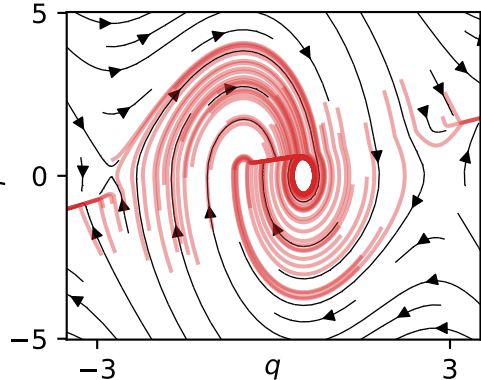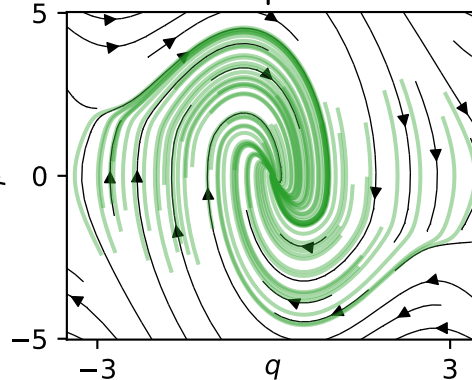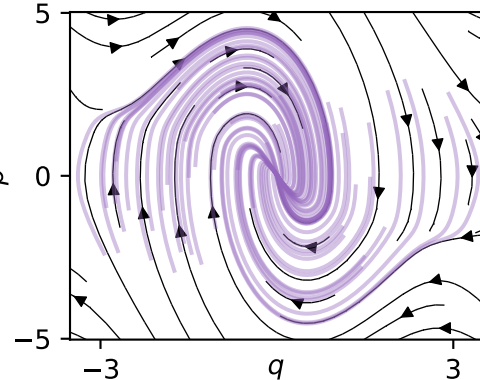

Position

$q(t)$

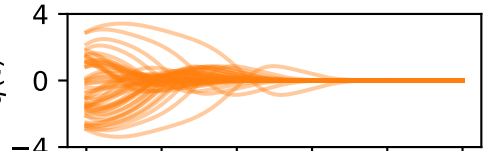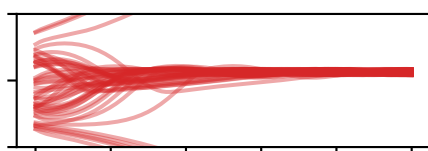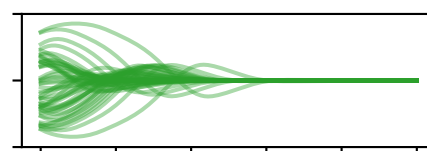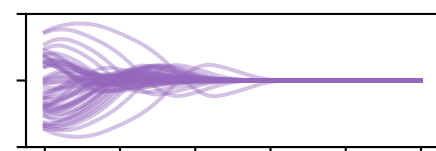

Momentum

$p(t)$

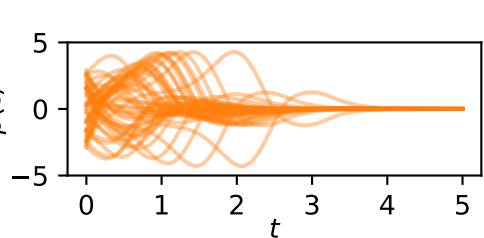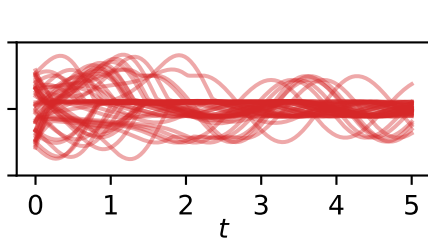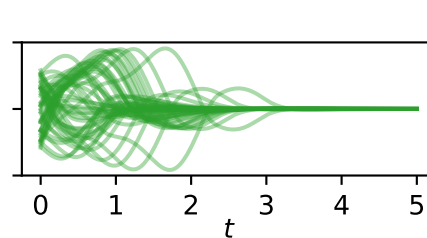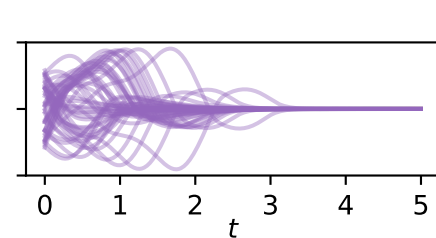

Supplement: supplementary_material [file attachment]
