# Supplementary material
Source: ML conference proceedings conference paper supplement (https://openreview.net/forum?id=m8bypnj7Yl5)

Without Hypersolver  
*Euler Residuals*

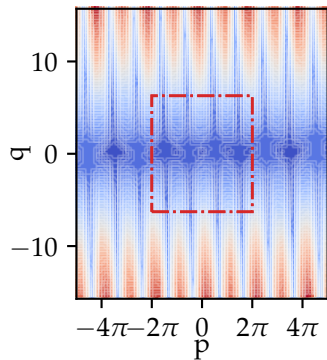

Tanh

$$x \rightarrow \frac{e^x - e^{-x}}{e^x + e^{-x}}$$

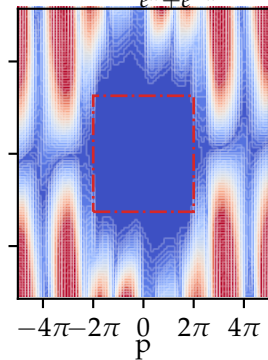

ReLU

$$x \rightarrow \max(0, x)$$

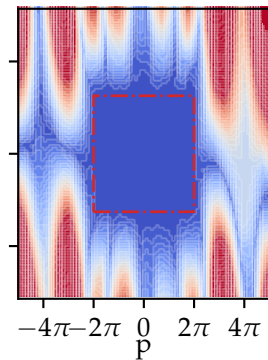

SIREN

$$x \rightarrow \sin(W_i x + b_i)$$

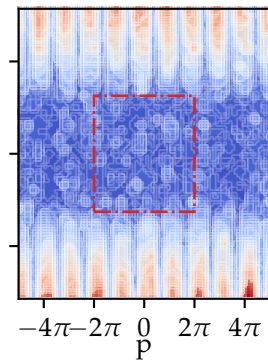

Snake

$$x \rightarrow x + \frac{1}{a} \sin^2(ax)$$

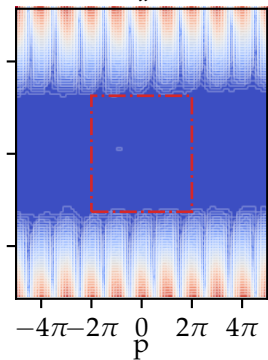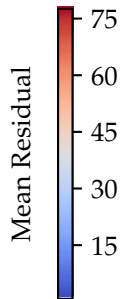

Supplement: supplementary_material [file attachment]
