# Supplementary material
Source: ML conference proceedings conference paper supplement (https://openreview.net/forum?id=m8bypnj7Yl5)
Supplement: supplementary_material [file attachment]

Position

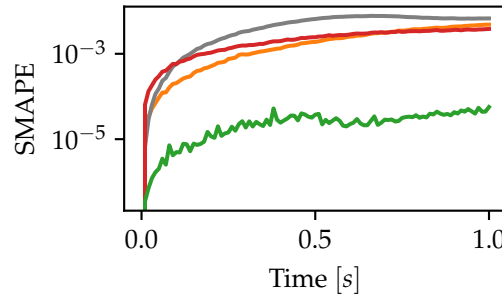

Velocity

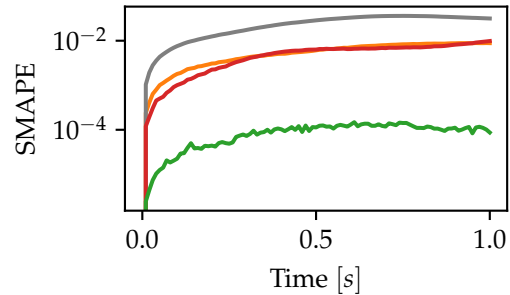

Angular Position

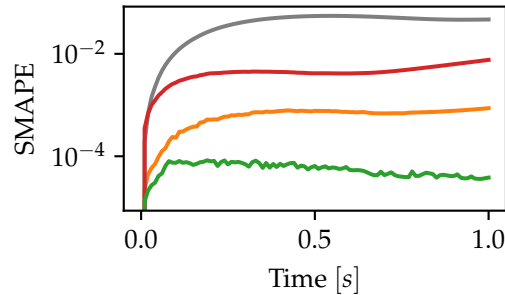

Angular Velocity

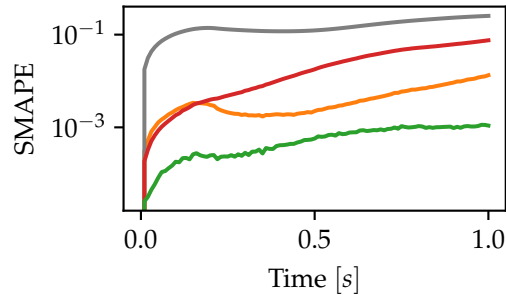

Multistage HyperEuler (inaccurate model)

Tsitouras45 (inaccurate model)

Euler (accurate model)

Midpoint (accurate model)
