# Supplementary material
Source: ML conference proceedings conference paper supplement (https://openreview.net/forum?id=m8bypnj7Yl5)

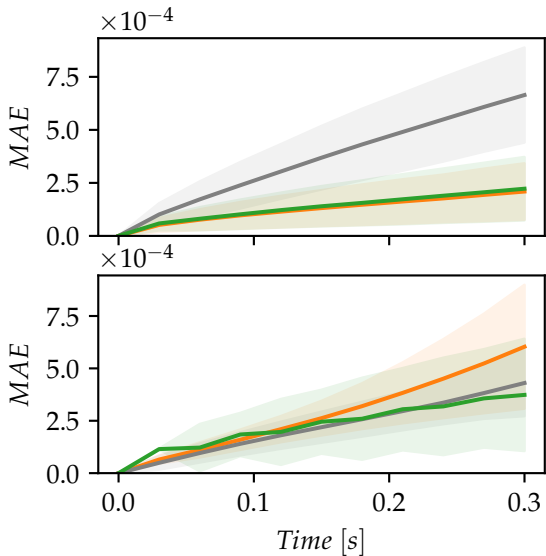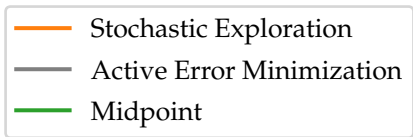

Supplement: supplementary_material [file attachment]

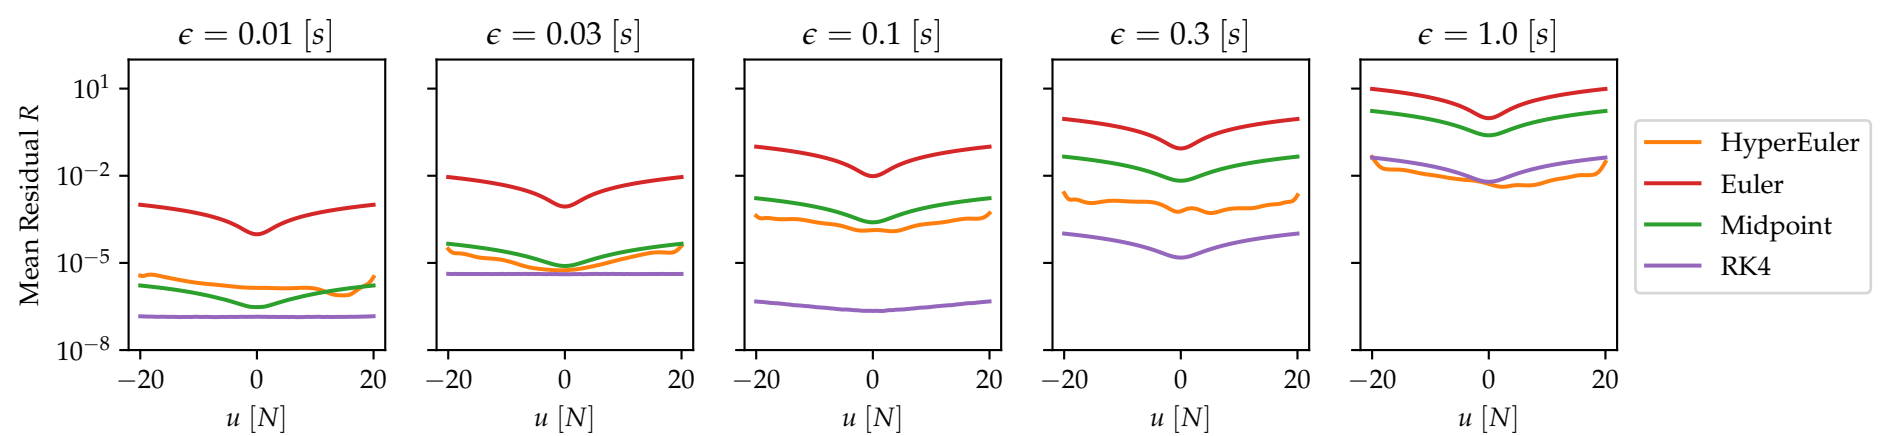

Supplement: supplementary_material [file attachment]

Final Position Error

$2 \times 10^0$   
 $10^0$   
 $6 \times 10^{-1}$   
 $4 \times 10^{-1}$   
 $3 \times 10^{-1}$

HyperEuler

Euler

Midpoint

RK4

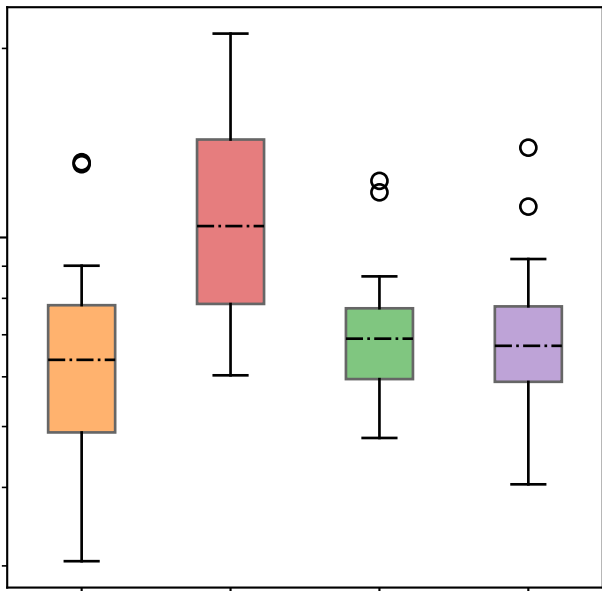

Supplement: supplementary_material [file attachment]

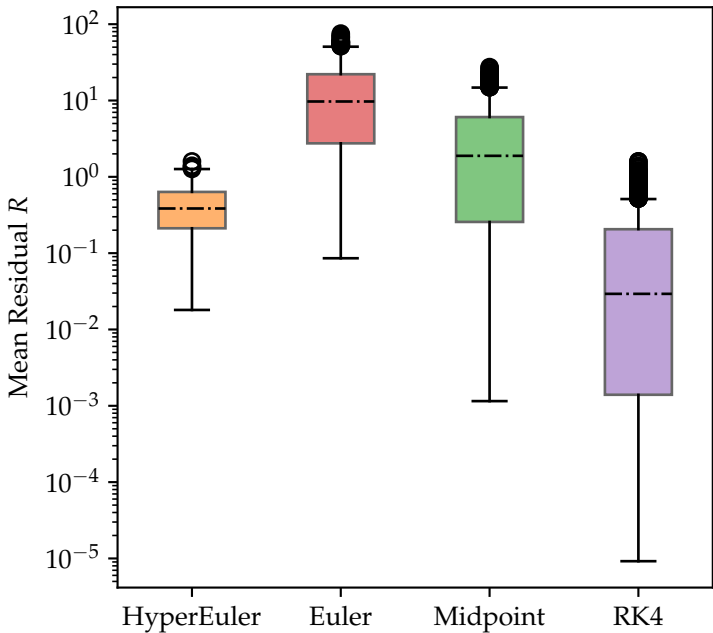

Supplement: supplementary_material [file attachment]

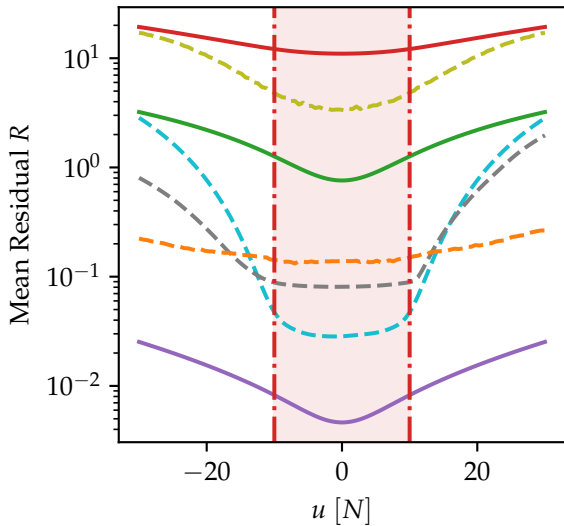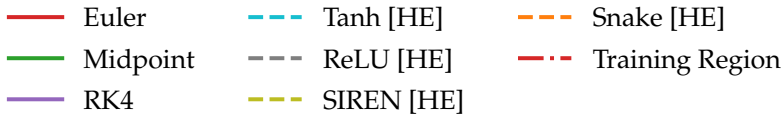

Supplement: supplementary_material [file attachment]

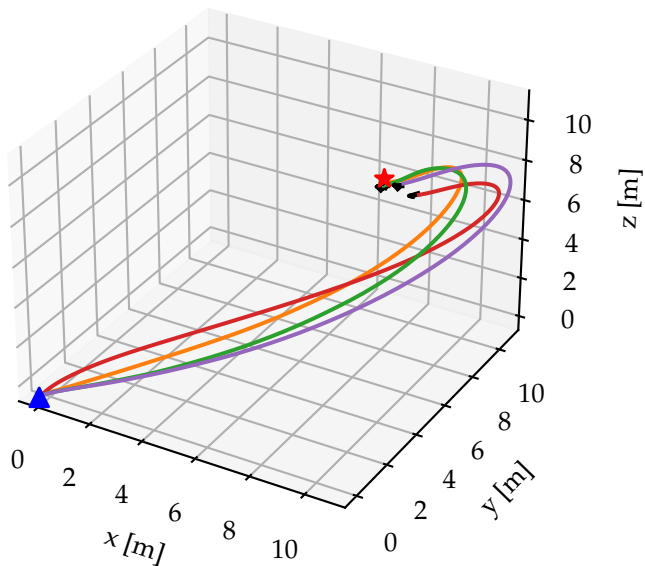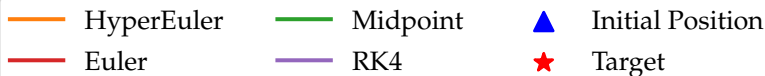

Supplement: supplementary_material [file attachment]

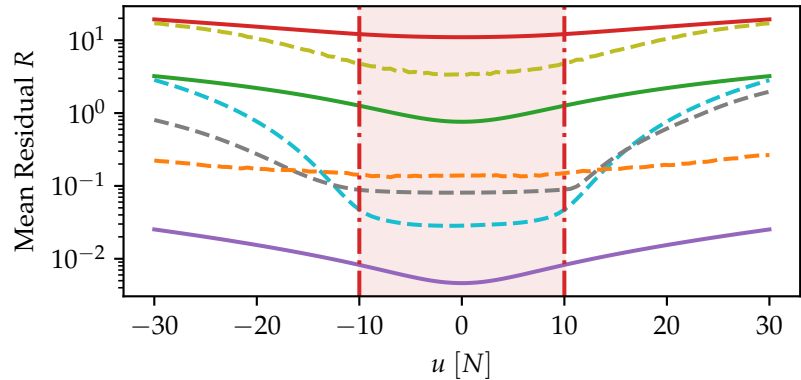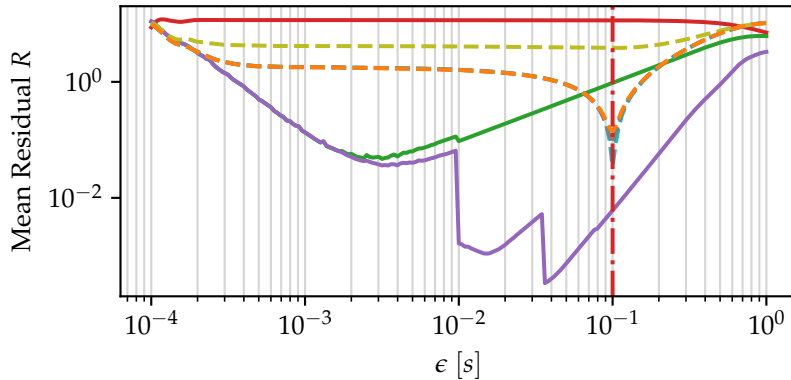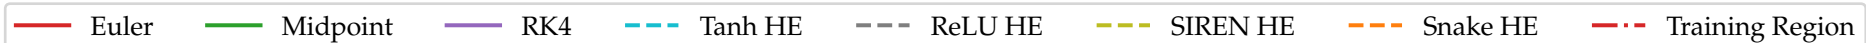

Supplement: supplementary_material [file attachment]

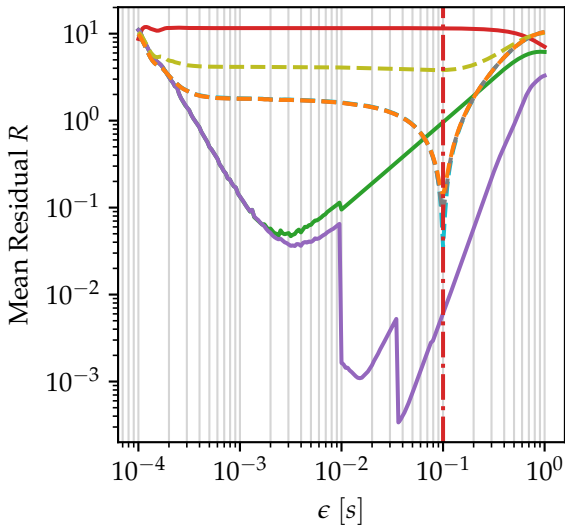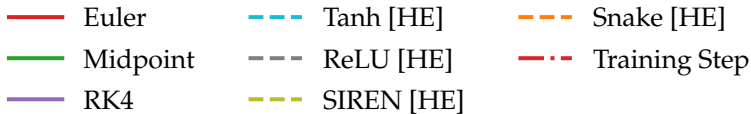

Supplement: supplementary_material [file attachment]

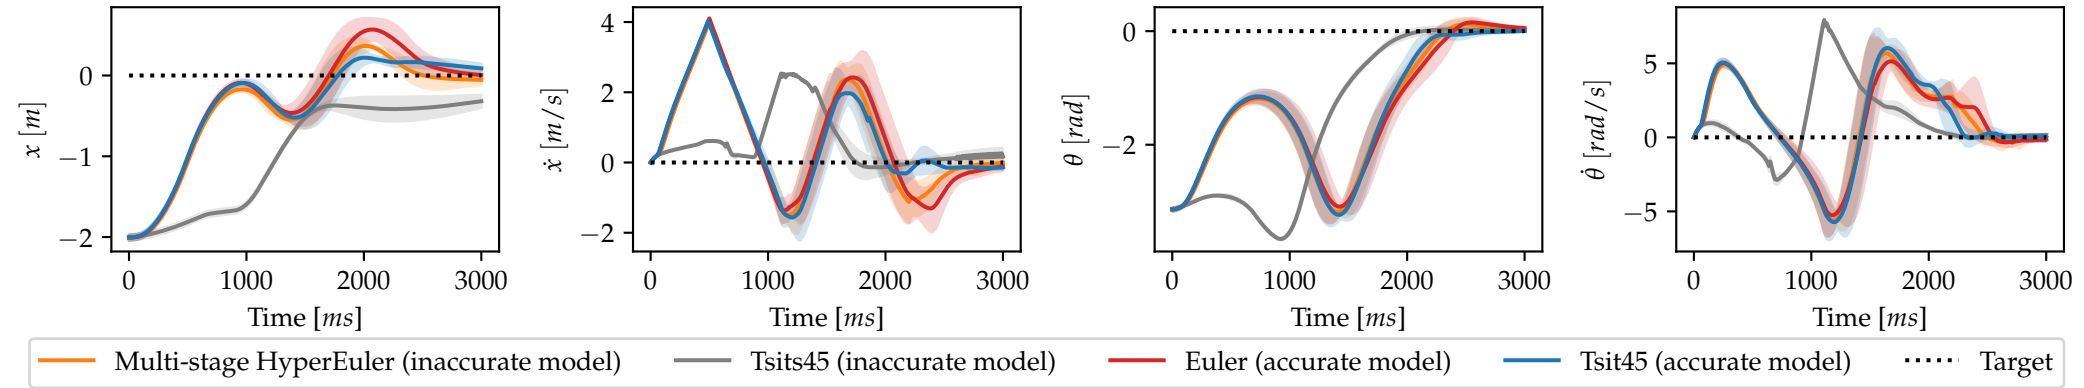

Supplement: supplementary_material [file attachment]
